# Supplementary figures and images for: DNA methylation-based prediction of response to immune checkpoint inhibition in metastatic melanoma
Source: HighWire-hosted journal article supplement (doi:10.1136/jitc-2020-002226), 2021-07-01

revised supplementary Figure 2

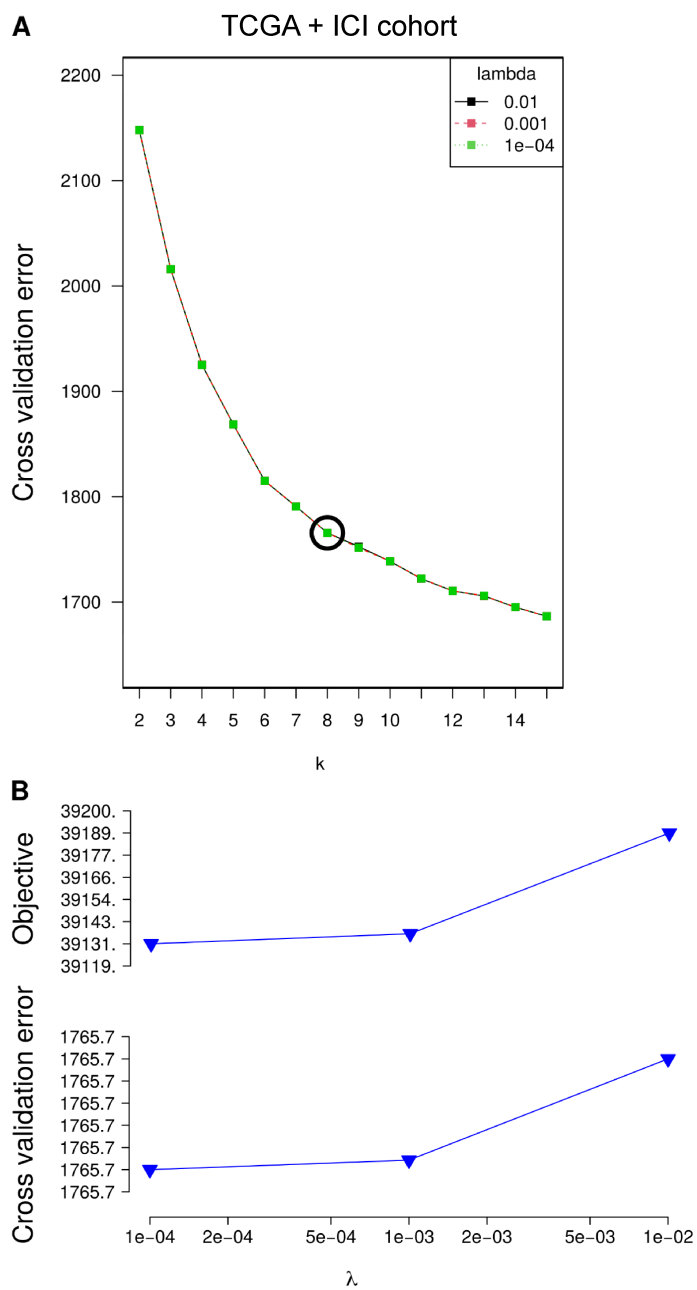

Supplement: jitc-2020-002226supp004_data_supplement.pdf [file jitc-2020-002226supp004_data_supplement.pdf]
